# Supplementary material for: Impact of antimalarial (AM) on serum lipids in systemic lupus erythematosus (SLE) patients: A systematic review and meta-analysis
Source: PubMed Central journal article supplement — Medicine (Baltimore). 2019 Apr 5;98(14):e15030. doi: 10.1097/MD.0000000000015030 (PMC6456110; doi:10.1097/md.0000000000015030), 2019-04-05
Supplement: medi-98-e15030-s001.pdf [file medi-98-e15030-s001.pdf]

**Supplemental. Complete Search Strategy for PubMed.**

Search (("Lipids"[Mesh]) OR (((lipid\*[Title/Abstract] OR TC[Title/Abstract] OR TG[Title/Abstract] OR LDL\*[Title/Abstract] OR VLDL\*[Title/Abstract]))) AND ((((((Chloro\*[Title/Abstract] OR "Chloroquine"[Mesh]) OR ("Hydroxychloroquine"[Mesh] OR Hydroxychloro\*[Title/Abstract] OR HCQ[Title/Abstract] OR Oxychloro\*[Title/Abstract]))) AND (((((Systemic Lupus Erythematosus[Title/Abstract] OR Lupus Erythematosus Disseminatus[Title/Abstract] OR Libman-Sacks Disease[Title/Abstract] OR SLE[Title/Abstract] OR "Lupus Erythematosus, Systemic"[Mesh]))
